# Supplementary material for: Thermoresponsive copolymers with pendant d-galactosyl 1,2,3-triazole groups: synthesis, characterization and thermal behavior
Source: Royal Society of Chemistry journal article supplement (doi:10.1039/c5nj01334h), 2015-01-01
Supplement: c5nj01334h1.pdf [file c5nj01334h1.pdf]

## Electronic Supplementary Information

### Thermoresponsive copolymers with pendant D-galactosyl 1,2,3-triazole groups: Synthesis, characterization and thermal behavior

Archana B. Dhumure<sup>a</sup>, Ajay B. Patil<sup>a</sup>, Anuja S. Kulkarni<sup>a</sup>, Irina Voevodina<sup>b</sup>,  
 Mariastella Scandola<sup>b</sup>, Vaishali S. Shinde<sup>a\*</sup>

<sup>a</sup>*Department of Chemistry, Savitribai Phule Pune University  
 (Formerly, University of Pune), Pune 411007, India*

<sup>b</sup>*Department of Chemistry 'G. Ciamician', University of Bologna,  
 Via Selmi 2, 40126 Bologna, Italy*

*\*Corresponding Author: Tel.: +91 20 25601395; Fax: +91 20 25691728;*

*E-mail: [vsshinde@chem.unipune.ac.in](mailto:vsshinde@chem.unipune.ac.in)*

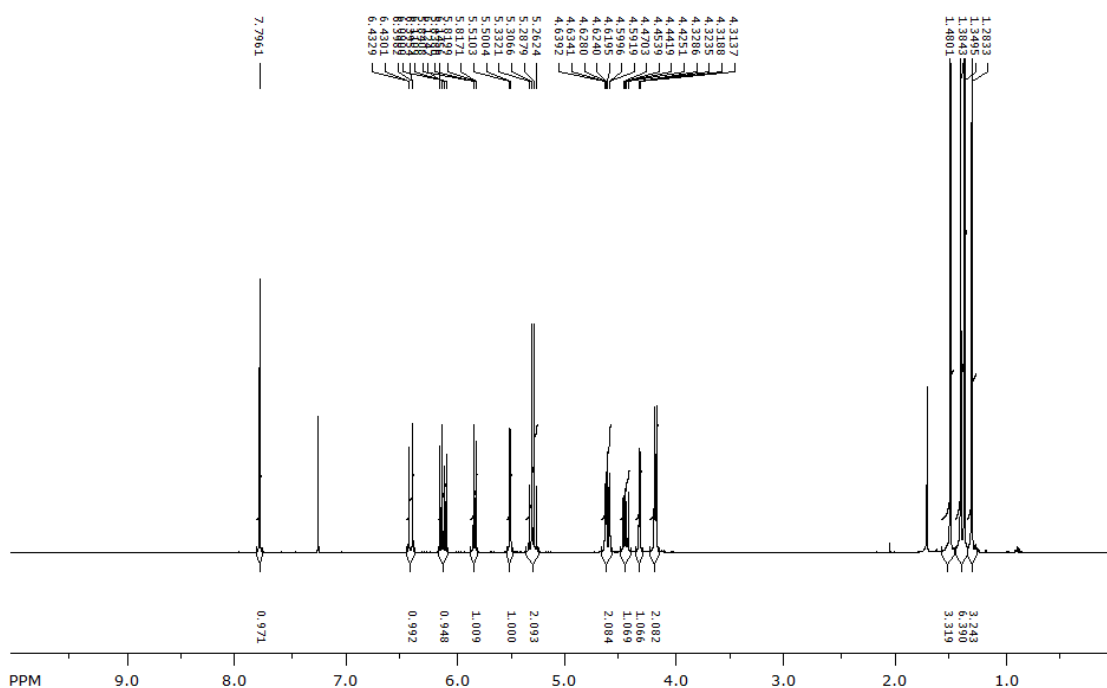

**Fig.S1** <sup>1</sup>H NMR of glycomonomer 5.

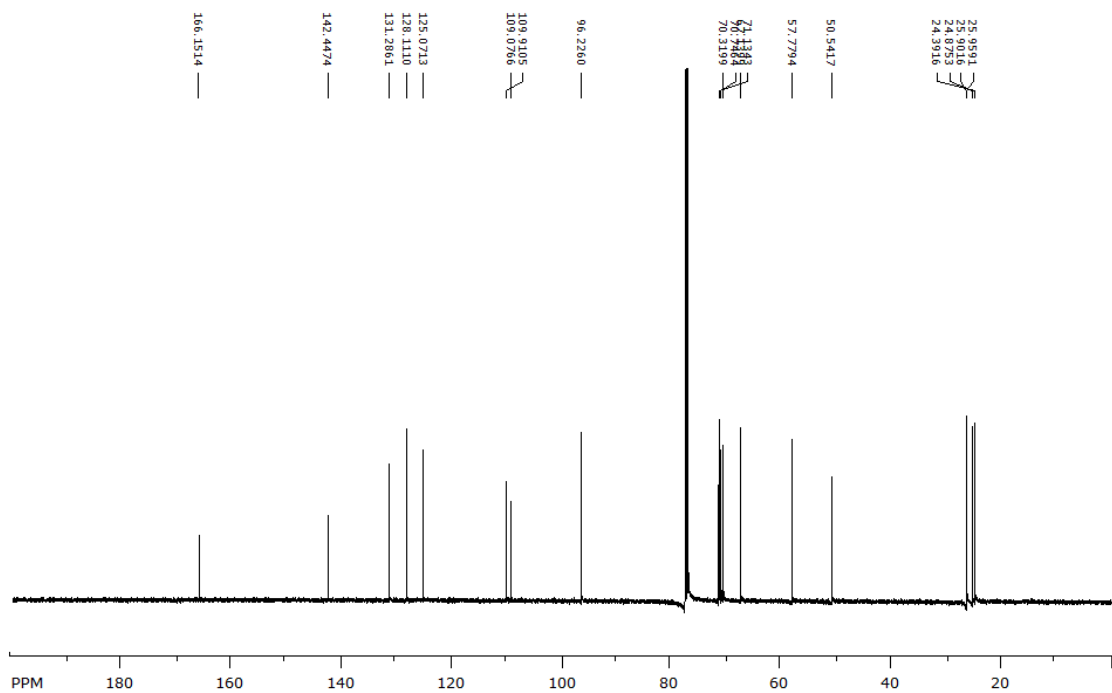

**Fig.S2**  $^{13}\text{C}$  NMR of glycomonomer **5**.

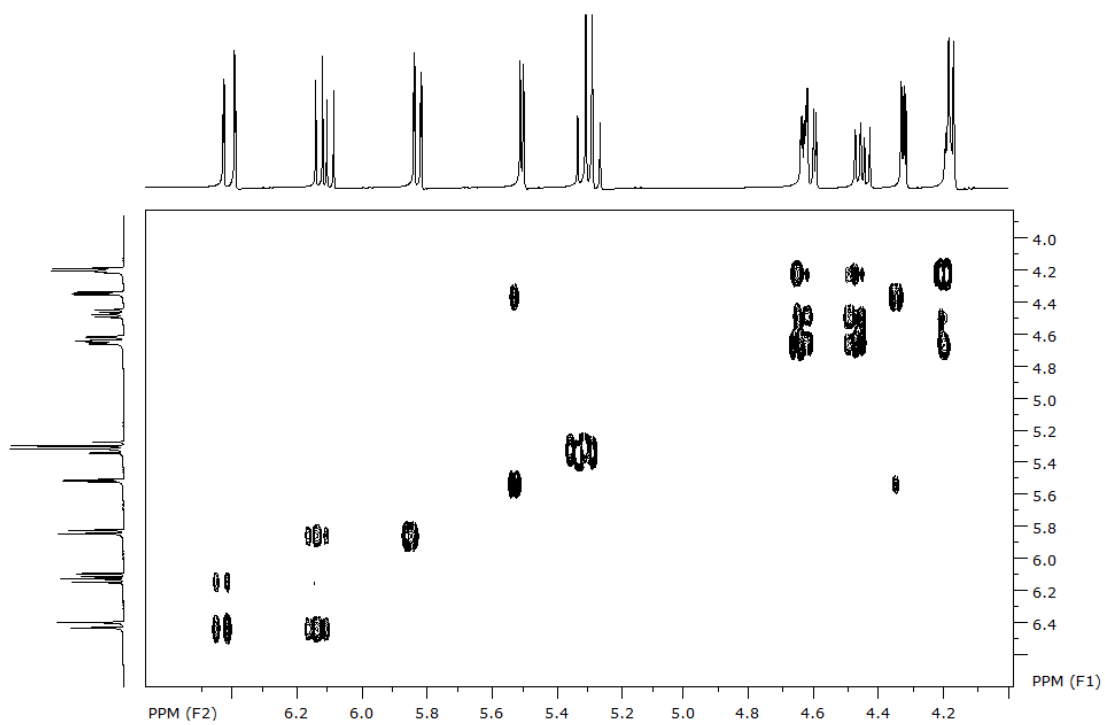

**Fig.S3** COSY NMR of glycomonomer **5**.

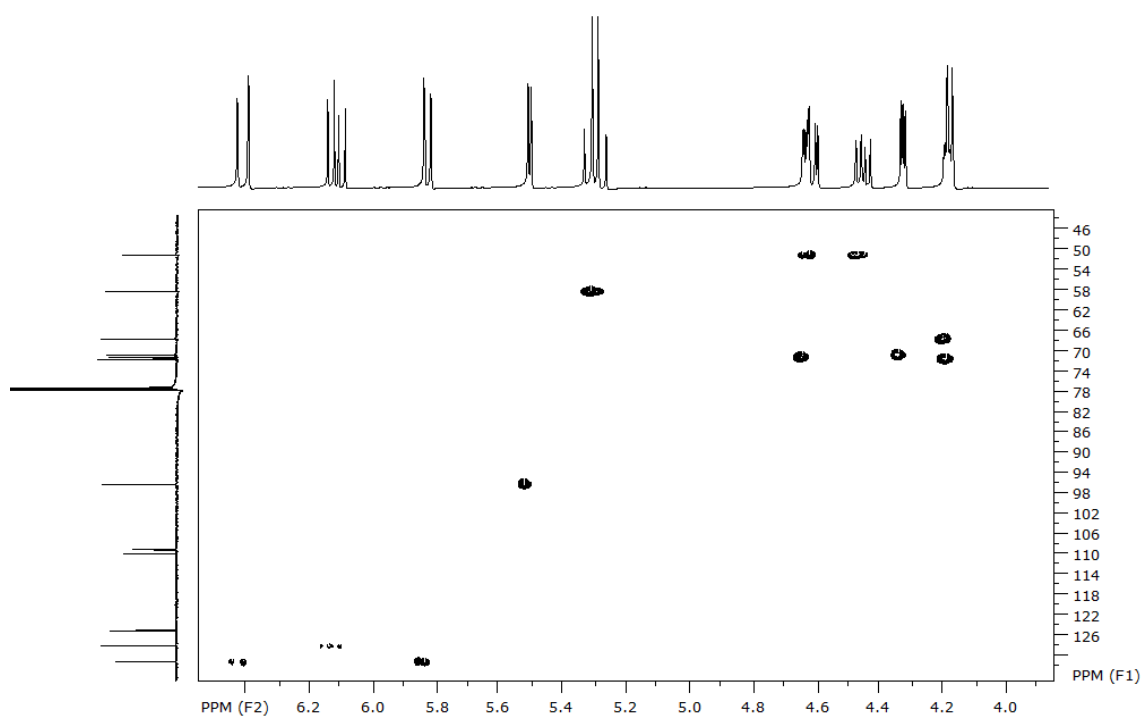

**Fig.S4** HSQC NMR of glycomonomer **5**.

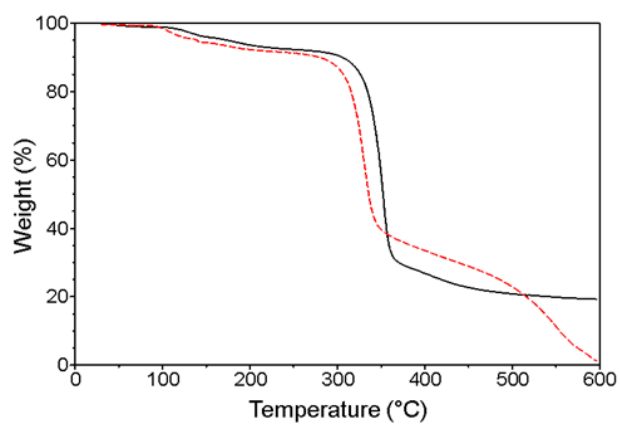

**Fig.S5** TGA curves of P-100 under N<sub>2</sub> flow (solid line) and under O<sub>2</sub> flow (dotted line)

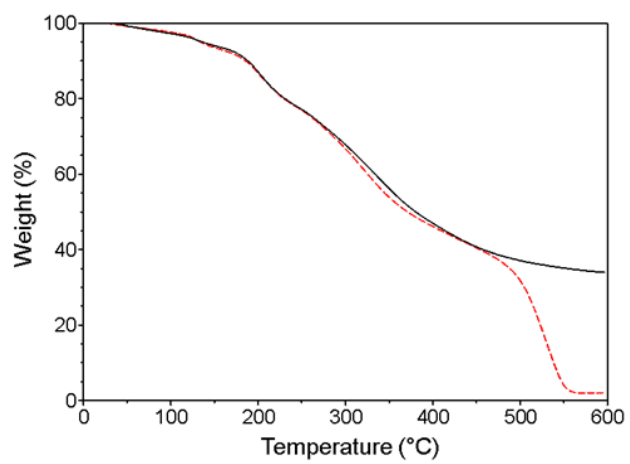

**Fig.S6** TGA curves of D-100 under N<sub>2</sub> flow (solid line) and under O<sub>2</sub> flow (red broken line)
